# Supplementary material for: Ebola virus VP35 hijacks the PKA-CREB1 pathway for replication and pathogenesis by AKIP1 association
Source: PubMed Central journal article supplement (PMC9042921; doi:10.1038/s41467-022-29948-4), 2022-04-26
Supplement: 41467_2022_29948_MOESM1_ESM.pdf [file 41467_2022_29948_MOESM1_ESM.pdf]

# 1 **Supplementary Information**

## 2 3 **Ebola Virus VP35 Hijacks the PKA-CREB1 Pathway for** 4 **Replication and Pathogenesis by AKIP1 Association**

5 Lin Zhu<sup>1,8</sup>, Ting Gao<sup>1,8</sup>, Yi Huang<sup>2,8</sup>, Jing Jin<sup>3</sup>, Di Wang<sup>3</sup>, Leike Zhang<sup>2</sup>, Yanwen Jin<sup>1</sup>, Ping Li<sup>1</sup>,  
6 Yong Hu<sup>1</sup>, Yan Wu<sup>2</sup>, Hainan Liu<sup>1</sup>, Qincai Dong<sup>1</sup>, Guangfei Wang<sup>1</sup>, Tong Zheng<sup>1</sup>, Caiwei Song<sup>1</sup>,  
7 Yu Bai<sup>3</sup>, Xun Zhang<sup>3</sup>, Yaoning Liu<sup>3</sup>, Weihong Yang<sup>3</sup>, Ke Xu<sup>4</sup>, Gang Zou<sup>5</sup>, Lei Zhao<sup>6</sup>, Ruiyuan  
8 Cao<sup>6</sup>, Wu Zhong<sup>6</sup>, Xianzhu Xia<sup>7</sup>, Gengfu Xiao<sup>2,\*</sup>, Xuan Liu<sup>1,\*</sup> and Cheng Cao<sup>1,\*</sup>

9  
10 <sup>1</sup>Beijing Institute of Biotechnology, Beijing 100850, China

11 <sup>2</sup>National Biosafety Laboratory, Chinese Academy of Sciences, Wuhan, Hubei 430020, China.

12 <sup>3</sup>Institute of Physical Science and Information Technology, Anhui University, Hefei, Anhui 230601,  
13 China.

14 <sup>4</sup>State Key Laboratory of Virology, College of Life Sciences, Wuhan University, Wuhan 430072,  
15 China.

16 <sup>5</sup>Insitut Pasteur of Shanghai, Chinese Academy of Sciences, Shanghai 200031, China.

17 <sup>6</sup>National Engineering Research Center for the Emergency Drug, Beijing Institute of Pharmacology and  
18 Toxicology, Beijing 100850, China.

19 <sup>7</sup>Changchun Veterinary Research Institute, Chinese Academy of Agricultural Sciences, Changchun  
20 130000, China.

21 <sup>8</sup>These authors contributed equally.

22  
23 \*Correspondence to:

24 Cheng Cao (Phone: +86-10-66931932; E-mail: [caoc@nic.bmi.ac.cn](mailto:caoc@nic.bmi.ac.cn))

25 Xuan Liu (Phone: +86-10-66931932; E-mail: [liux931932@163.com](mailto:liux931932@163.com))

26 Gengfu Xiao (Phone: +86-27-87198685; E-mail: [xiaogf@wh.iov.cn](mailto:xiaogf@wh.iov.cn))

27

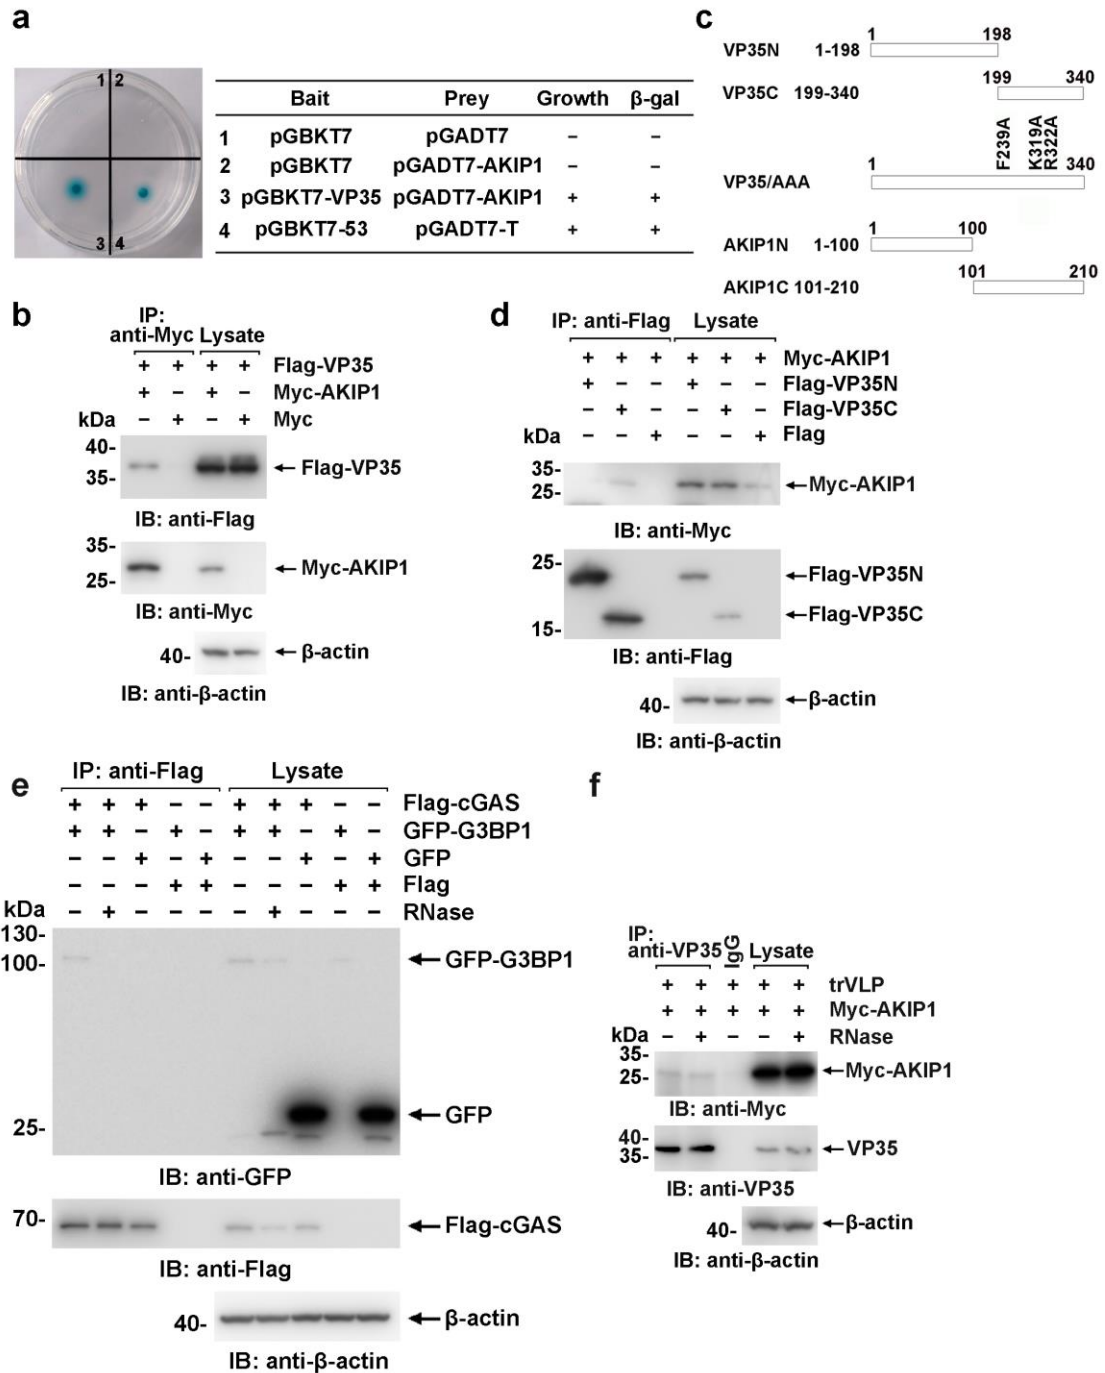

28

29 **Supplementary Fig. 1 The interaction between EBOV VP35 and AKIP1.**

30 **a**, Yeast Y2HGold cells were transformed with the indicated plasmids (bait and prey for the  
 31 two-hybrid assay) and grown on selective medium. Positive interactions were indicated by  
 32 colonies that grew on selective medium with  $\beta$ -galactosidase activity (blue). **b**, **d**, Lysates of  
 33 HEK293 cells cotransfected with the indicated plasmids were analyzed by immunoprecipitation

34 and immunoblotting. The data from two independent experiments are presented. **c**, Graphical  
35 representation of VP35 and AKIP1 mutants. **e**, Lysates of HEK293 cells transfected with the  
36 indicated plasmids were treated with/without RNase (the mixture of RNase A and RNase T1) and  
37 analyzed using immunoprecipitation and immunoblotting. The data from three independent  
38 experiments are presented. **f**, Lysates of HEK293 cells transfected with Myc-AKIP1 and the  
39 EBOV minigenome (p0) were immunoprecipitated using anti-VP35 or IgG and analyzed by  
40 immunoblotting with indicated antibodies. The data from two independent experiments are  
41 presented.

42

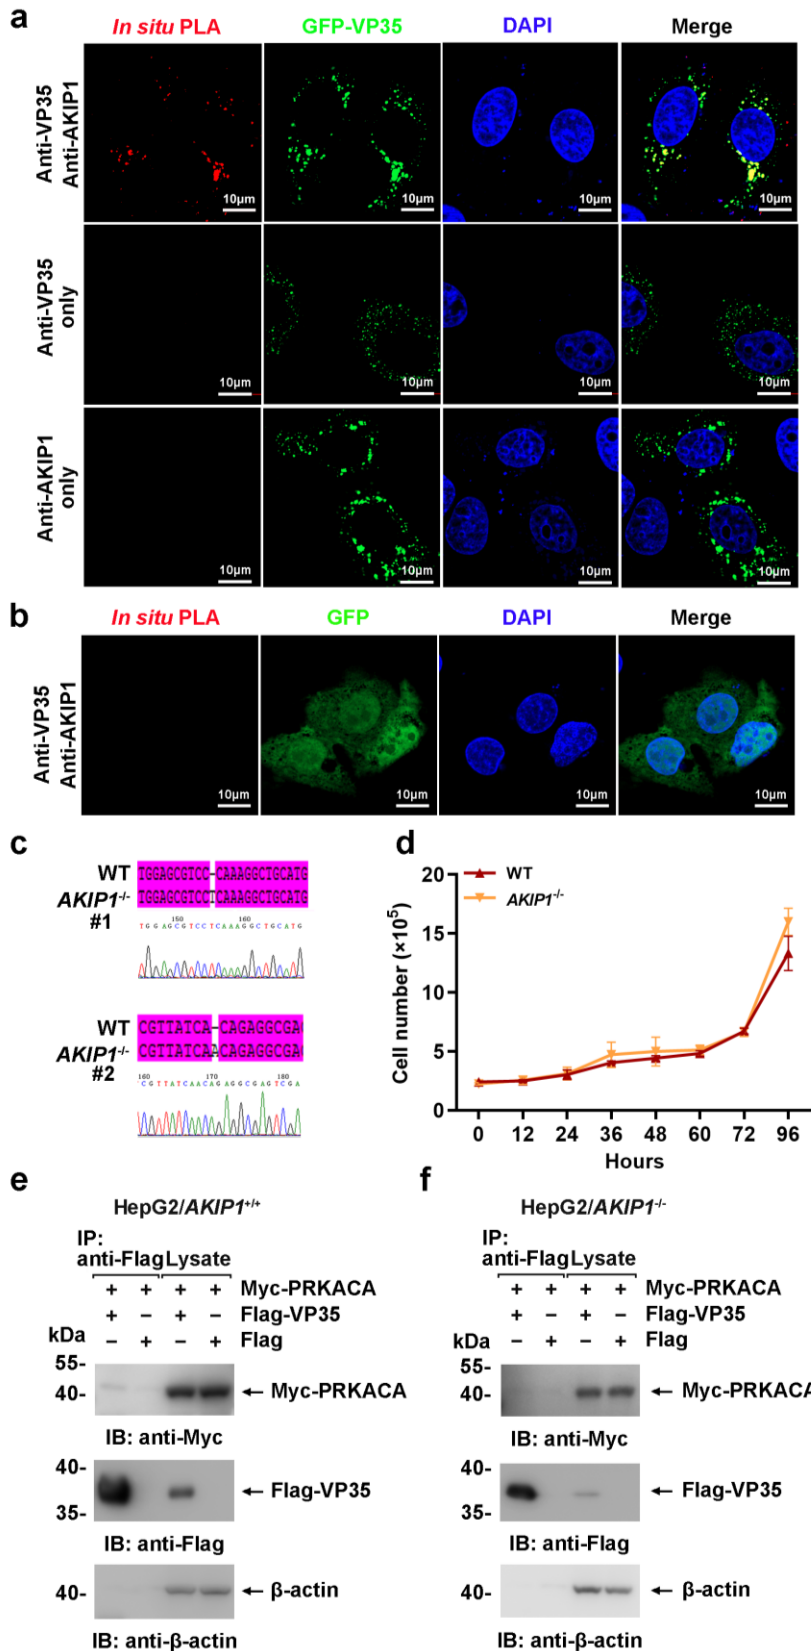

43

44 **Supplementary Fig. 2 EBOV VP35 interacts with PRKACA through AKIP1.**

45 **a, b,** HepG2 cells were transfected with GFP-VP35 (a) or the GFP vector (b) and then subjected to

46 an *in situ* PLA assay with the indicated antibodies. **c, d**, Two independent clones of *AKIP1*<sup>-/-</sup>  
47 HepG2 cells (KO1 and KO2) were generated with CRISPR/Cas9 and confirmed by sequencing (**c**).  
48 Cell proliferation is shown in (**d**). The mean ± s.e.m. from three independent assays is presented  
49 (n=3). **e, f**, Lysates of WT (**e**) and *AKIP1*<sup>-/-</sup> (**f**) HepG2 cells cotransfected with the indicated  
50 plasmids were analyzed using immunoprecipitation and immunoblotting. At least three  
51 independent replicates of all experiments were performed.  
52

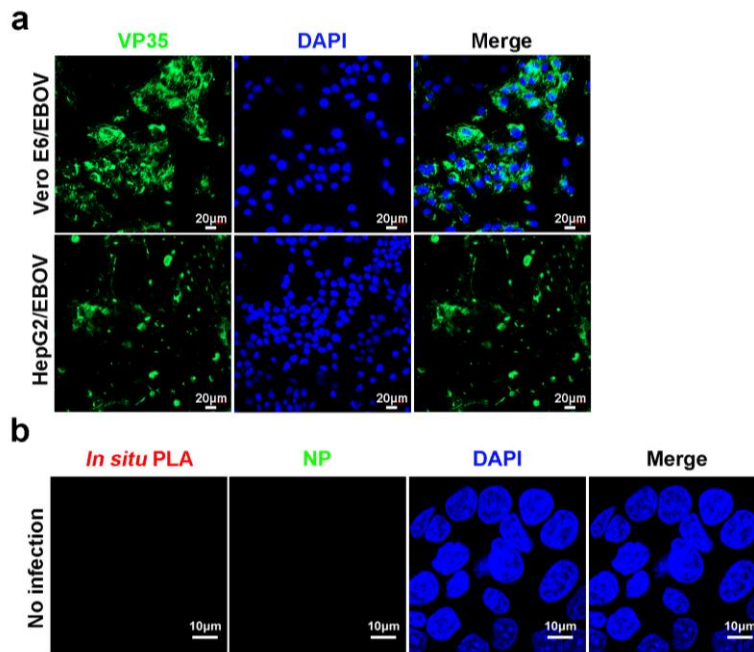

53

54 **Supplementary Fig. 3 EBOV VP35 associates with AKIP1 in the cell.**

55 **a**, HepG2 or Vero E6 cells were infected with live EBOV (MOI=10) for 72 h and immunostained  
 56 with an anti-VP35 antibody. The data from three independent experiments are presented. **b**, As a  
 57 control for the result presented in the main text (Fig. 2b), uninfected HepG2 cells were subjected  
 58 to an *in situ* PLA assay and immunofluorescence staining with an anti-NP antibody. The data from  
 59 three independent experiments are presented.

60

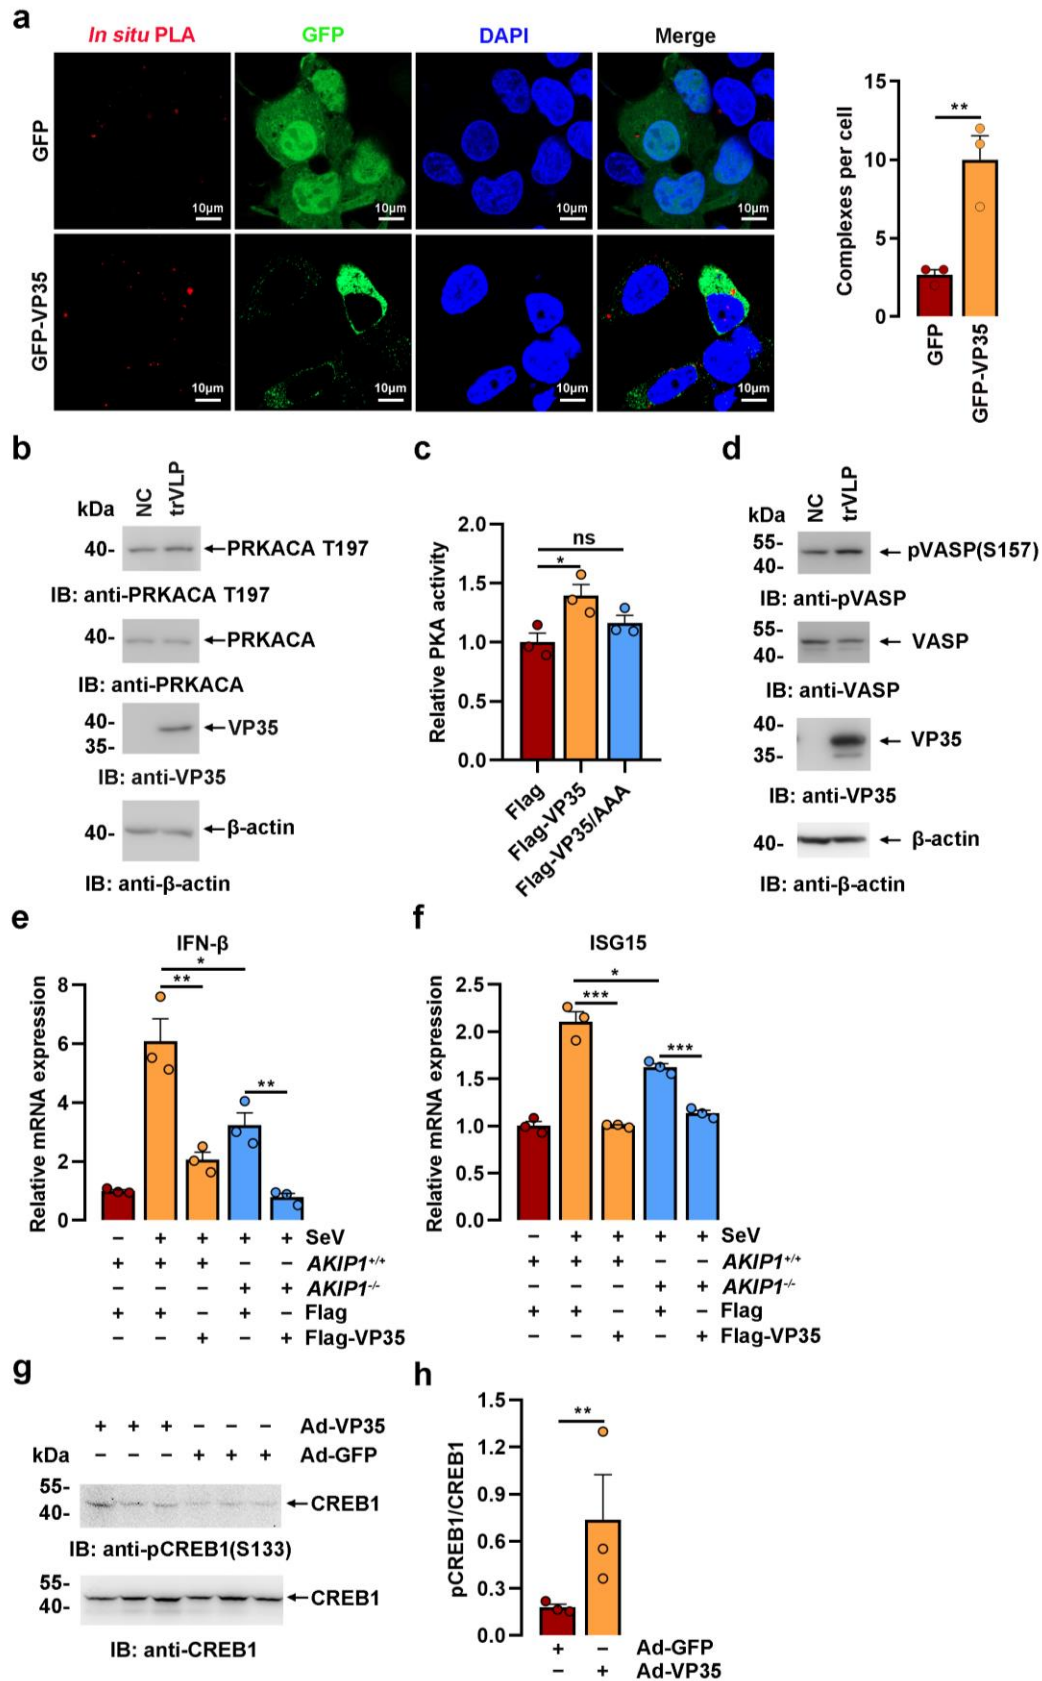

61

62 Supplementary Fig. 4 EBOV VP35 promotes the AKIP1-*PKA* interaction and CREB1

63 phosphorylation.

64 **a**, HepG2 cells transfected with GFP-VP35 or GFP were subjected to *in situ* PLA with anti-AKIP1  
65 and anti-PRKACA antibodies (left panel), and the signal for the PLA complex in each cell was  
66 counted from at least 10 cells and presented as the means  $\pm$  s.e.m. (n=10; right panel). Differences  
67 between the two groups were evaluated using the two-sided unpaired Student's *t*-test. **\*\*P** < 0.01.  
68 **b**, Lysates of HepG2 cells transfected with or without the EBOV minigenome (p0) were analyzed  
69 by immunoblotting with an anti-pPRKACA-T197 antibody. **c**, Lysates of HepG2 cells transfected  
70 with Flag vector, Flag-VP35 or Flag-VP35/AAA mutant plasmids were subjected to PKA activity  
71 assays. Differences between the two groups were evaluated using the two-sided unpaired  
72 Student's *t*-test. Data are presented as mean  $\pm$  s.e.m. (ns, not significant; **\*P** < 0.05). **d**, HepG2  
73 cells transfected with or without the EBOV minigenome (p0) were analyzed using  
74 immunoblotting with an anti-pVASP-S157 antibody. **e**, **f**, WT and *AKIP1*-depleted HepG2 cells  
75 were transfected with Flag or Flag-VP35 plasmid for 24 h, and then infected with or without SeV at  
76 an MOI of 2 for 12 h. The mRNA levels of IFN- $\beta$  (**e**) and ISG15 (**f**) were quantified using  
77 qRT-PCR. Differences between the two groups were evaluated using the two-sided unpaired  
78 Student's *t*-test. Data are presented as mean  $\pm$  s.e.m. (**\*P** < 0.05; **\*\*P** < 0.01; **\*\*\*P** < 0.001). **g**,  
79 C57BL/6N mice (10 weeks) were infected with Ad-VP35 or Ad-GFP ( $2 \times 10^9$  PFU) via the tail vein  
80 twice at 24 h intervals. Three days later, the liver tissues were homogenized and analyzed by  
81 immunoblotting with anti-CREB1 pS133 or anti-CREB1 antibodies. **h**, The ratio of CREB1  
82 pS133/CREB1 was quantified through densitometry with ImageJ software (n=3). Differences  
83 between the two groups were evaluated using the two-sided unpaired Student's *t*-test. All data  
84 from three independent experiments are presented as the mean  $\pm$  s.e.m. (**\*\*P** < 0.01).

85



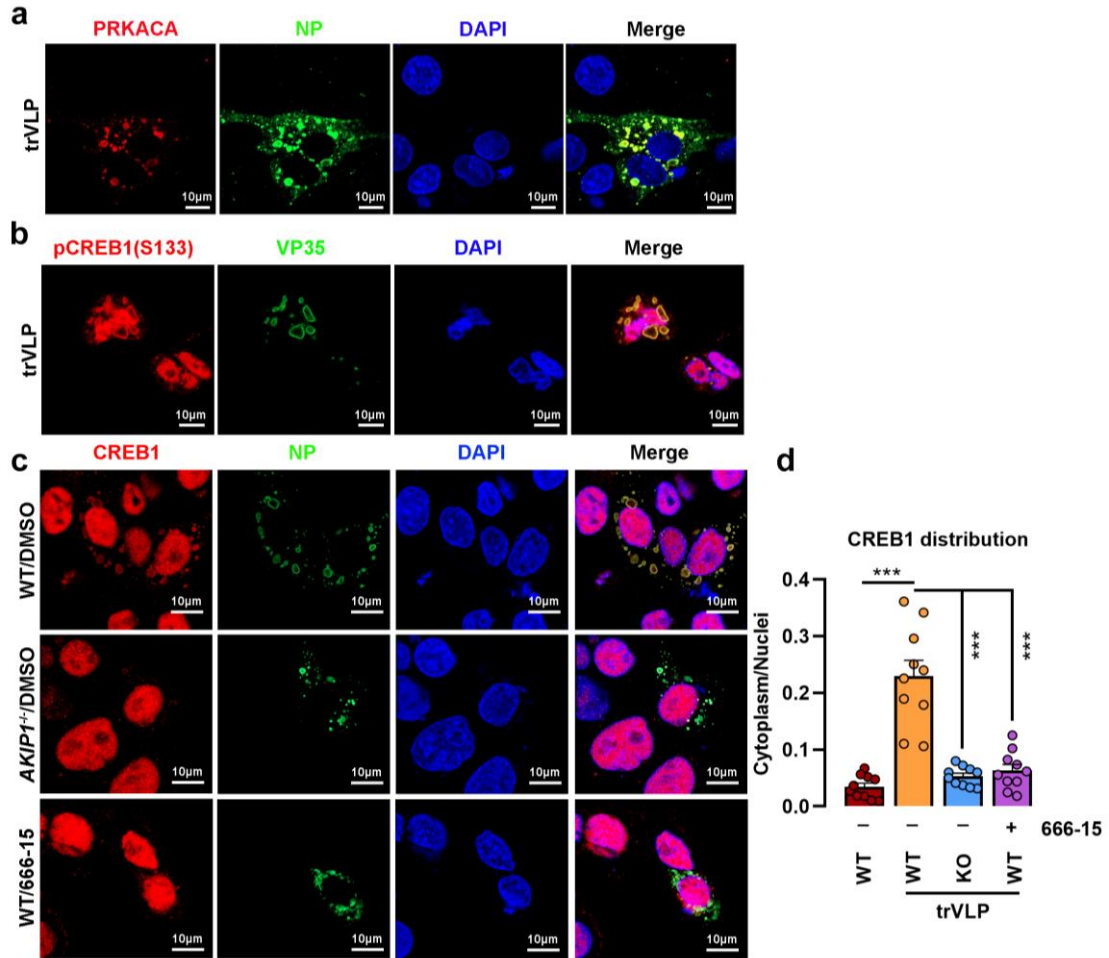

86

87 **Supplementary Fig. 5 CREB1 is hijacked by viral VP35 into the VIBs of trVLPs-infected**

88 **cells to regulate viral replication.**

89 **a, b,** HepG2 cells transfected with the EBOV minigenome (p0) were immunostained with

90 anti-PRKACA (red in **a**), anti-NP (green in **a**), anti-pCREB1 S133 (red in **b**) or anti-VP35 (green

91 in **b**) antibodies. **c, d,** WT and *AKIP1*-depleted (KO) HepG2 cells transfected with the EBOV

92 minigenome (p0) and treated with or without 666-15 (1  $\mu$ M) were immunostained with the

93 indicated antibodies. The cytoplasmic/nuclear distribution of CREB1 in (**c**) was analyzed using

94 ImageJ software, and the means  $\pm$  s.e.m. from at least 10 cells are presented (**d**). Differences

95 between the two groups were evaluated using the two-sided unpaired Student's *t*-test. All data

96 from three independent replicates are presented as the means  $\pm$  s.e.m. (\*\*\*) $P < 0.001$ .

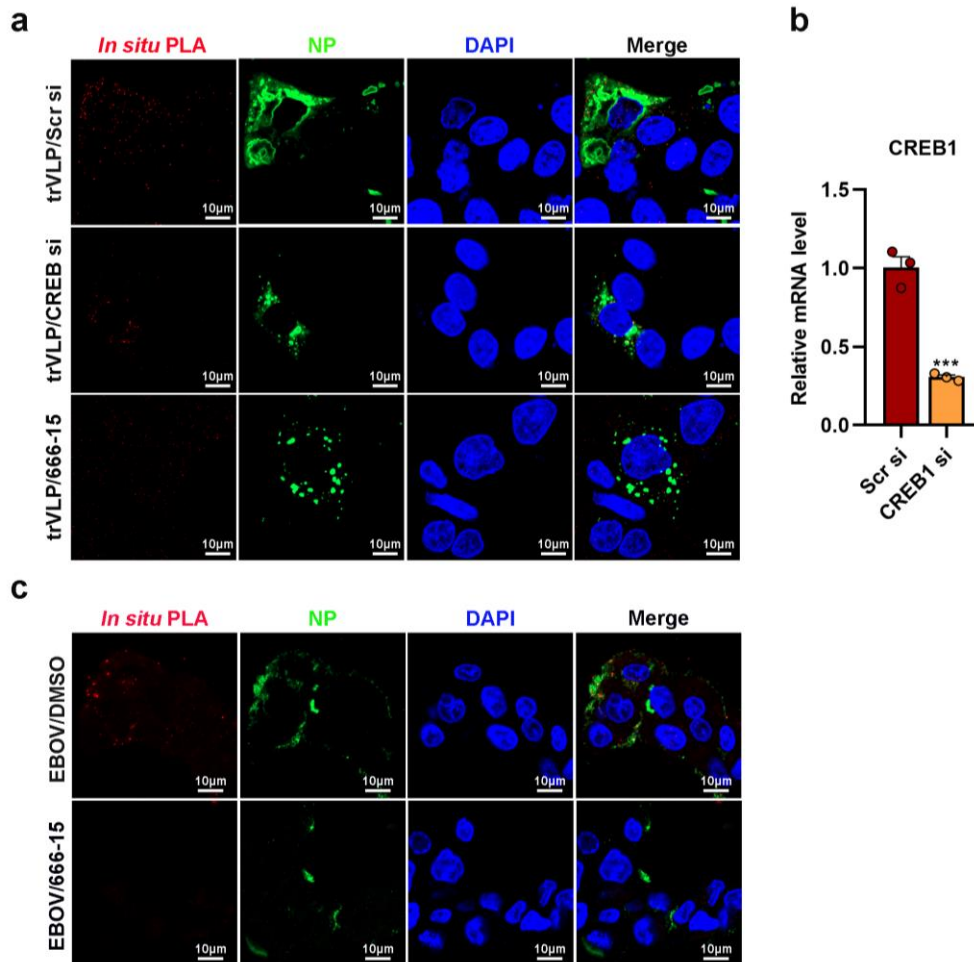

97

98 **Supplementary Fig. 6 EBOV VP35 and CREB1 association in VIBs after EBOV or trVLPs**

99 **infection.**

100 **a, b,** HepG2 cells were transfected with CREB1 siRNA or scrambled (Scr) siRNA for 6 h. Next,

101 the cells were transfected with the EBOV minigenome (p0), treated with or without 1  $\mu$ M 666-15

102 for 48 h and then subjected to an *in situ* PLA assay with anti-VP35 and anti-CREB1 antibodies

103 and immunostaining with an anti-NP antibody (green). The silencing efficiency of the CREB1

104 siRNA was determined using qRT-PCR (**b**). Differences between the two groups were evaluated

105 using the two-sided unpaired Student's *t*-test. The data from three independent replicates are

106 presented as the means  $\pm$  s.e.m. (\*\*\*)  $P < 0.001$ . **c,** HepG2 cells infected with live EBOV

107 (MOI=10) were treated with or without 1  $\mu$ M 666-15 for 48 h, subjected to an *in situ* PLA assay

108 with anti-VP35 and anti-CREB1 antibodies, and immunostained with an anti-NP antibody (green).

109 The data from three independent replicates are presented.

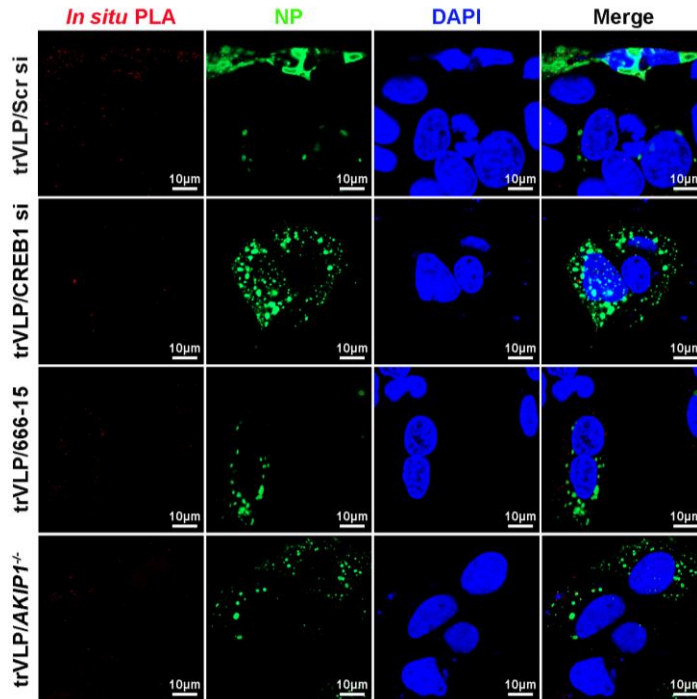

110

111 **Supplementary Fig. 7 The VP35:L association and VIBs formation are suppressed by *AKIP1***  
 112 **depletion, CREB1 knockdown or CREB1 inhibition.**

113 WT and *AKIP1*<sup>-/-</sup> HepG2 cells were transfected with the CREB1 siRNA or scrambled (Scr) siRNA  
 114 for 6 h. Next, the cells were transfected with the EBOV minigenome (p0), treated with or without  
 115 1 μM 666-15 for 48 h, subjected to an *in situ* PLA assay with anti-VP35 and anti-L antibodies  
 116 (red), and immunostained with an anti-NP antibody (green). At least two independent replicates  
 117 were performed in all of the experiments.

118

119

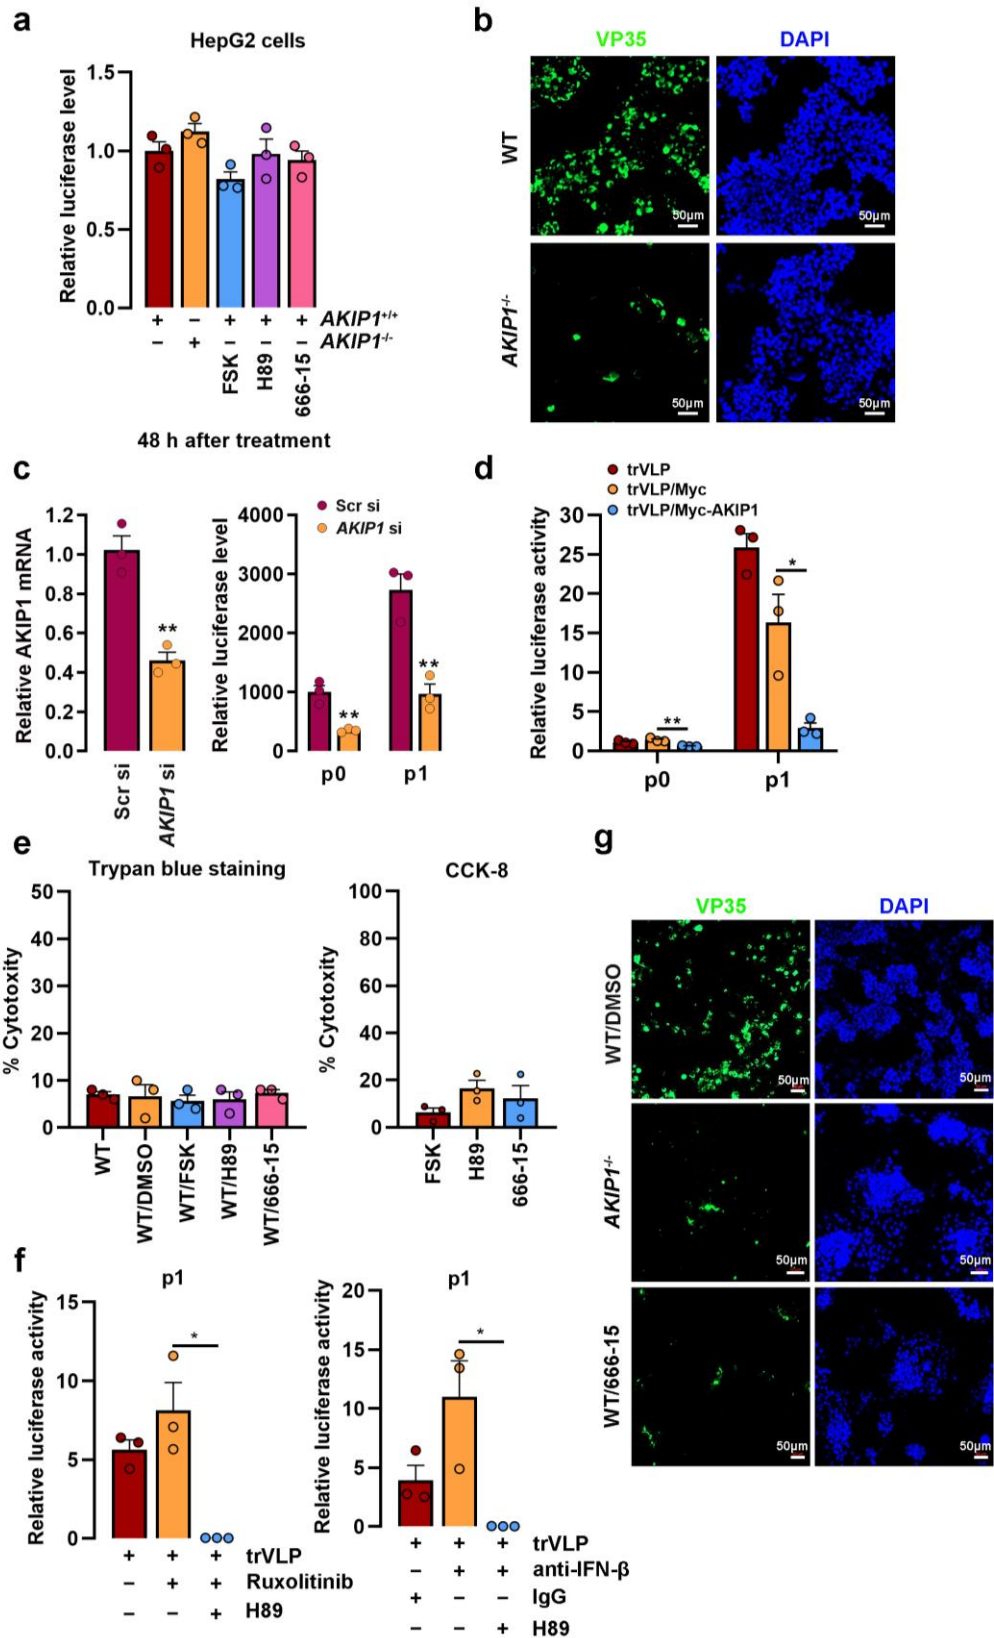

120

121 **Supplementary Fig. 8 The AKIP1-PKA-CREB1 axis potentiates EBOV replication.**

122 **a**, WT and *AKIP1*<sup>-/-</sup> HepG2 cells were transfected with firefly luciferase plasmids and treated with

123 FSK (25  $\mu$ M), H89 (10  $\mu$ M), or 666-15 (1  $\mu$ M) for 48 h. The firefly luciferase activity was  
124 determined. **b**, WT and *AKIP1*<sup>-/-</sup> HepG2 cells transfected with the EBOV minigenome (p0) for 48  
125 h and then immunostained with an anti-VP35 antibody (green). **c**, HepG2 cells were transfected  
126 with the EBOV minigenome (p0 and p1) for 12 h. Then, p1 cells were transfected with the AKIP1  
127 siRNA (*AKIP1* si) or scrambled (Scr) siRNA. The effect of the siRNA on AKIP1 expression was  
128 determined using qRT-PCR (left panel), and the amounts of trVLPs were determined using the  
129 luciferase activity assay (right panel). Differences between the two groups were evaluated using  
130 the two-sided unpaired Student's *t*-test. Data are presented as mean  $\pm$  s.e.m. (\*\**P* < 0.01). **d**,  
131 HepG2 cells were transfected with Myc vector or Myc-AKIP1 for 6 h. Then, the cells were  
132 transfected with the EBOV minigenome. The amounts of trVLPs were determined by luciferase  
133 activity assay. Differences between the two groups were evaluated using the two-sided unpaired  
134 Student's *t*-test. Data are presented as mean  $\pm$  s.e.m. (\**P* < 0.05; \*\**P* < 0.01). **e**, The cytotoxicity of  
135 the tested drugs (25  $\mu$ M FSK; 10  $\mu$ M H89; 1  $\mu$ M 666-15) to HepG2 cells was determined by  
136 trypan blue staining (left panel) or CCK-8 assays (right panel). **f**, HepG2 cells were transfected  
137 with the EBOV minigenome (p1) and treated with an anti-IFN- $\beta$  antibody (25 ng/ml, left panel),  
138 the JAK1 inhibitor ruxolitinib (10  $\mu$ M, right panel), and/or H89 (10  $\mu$ M) for 48 h. The amounts of  
139 trVLPs were determined using a luciferase activity assay. Differences between the two groups  
140 were evaluated using the two-sided unpaired Student's *t*-test. Data are presented as mean  $\pm$  s.e.m.  
141 (\**P* < 0.05). **g**, WT and *AKIP1* KO HepG2 cells infected with live EBOV (MOI=10) were treated  
142 with 666-15 (1  $\mu$ M) or vehicle for 72 h. Cells were then analyzed by immunostaining with an  
143 anti-VP35 antibody (green). All data from three independent replicates are presented.  
144

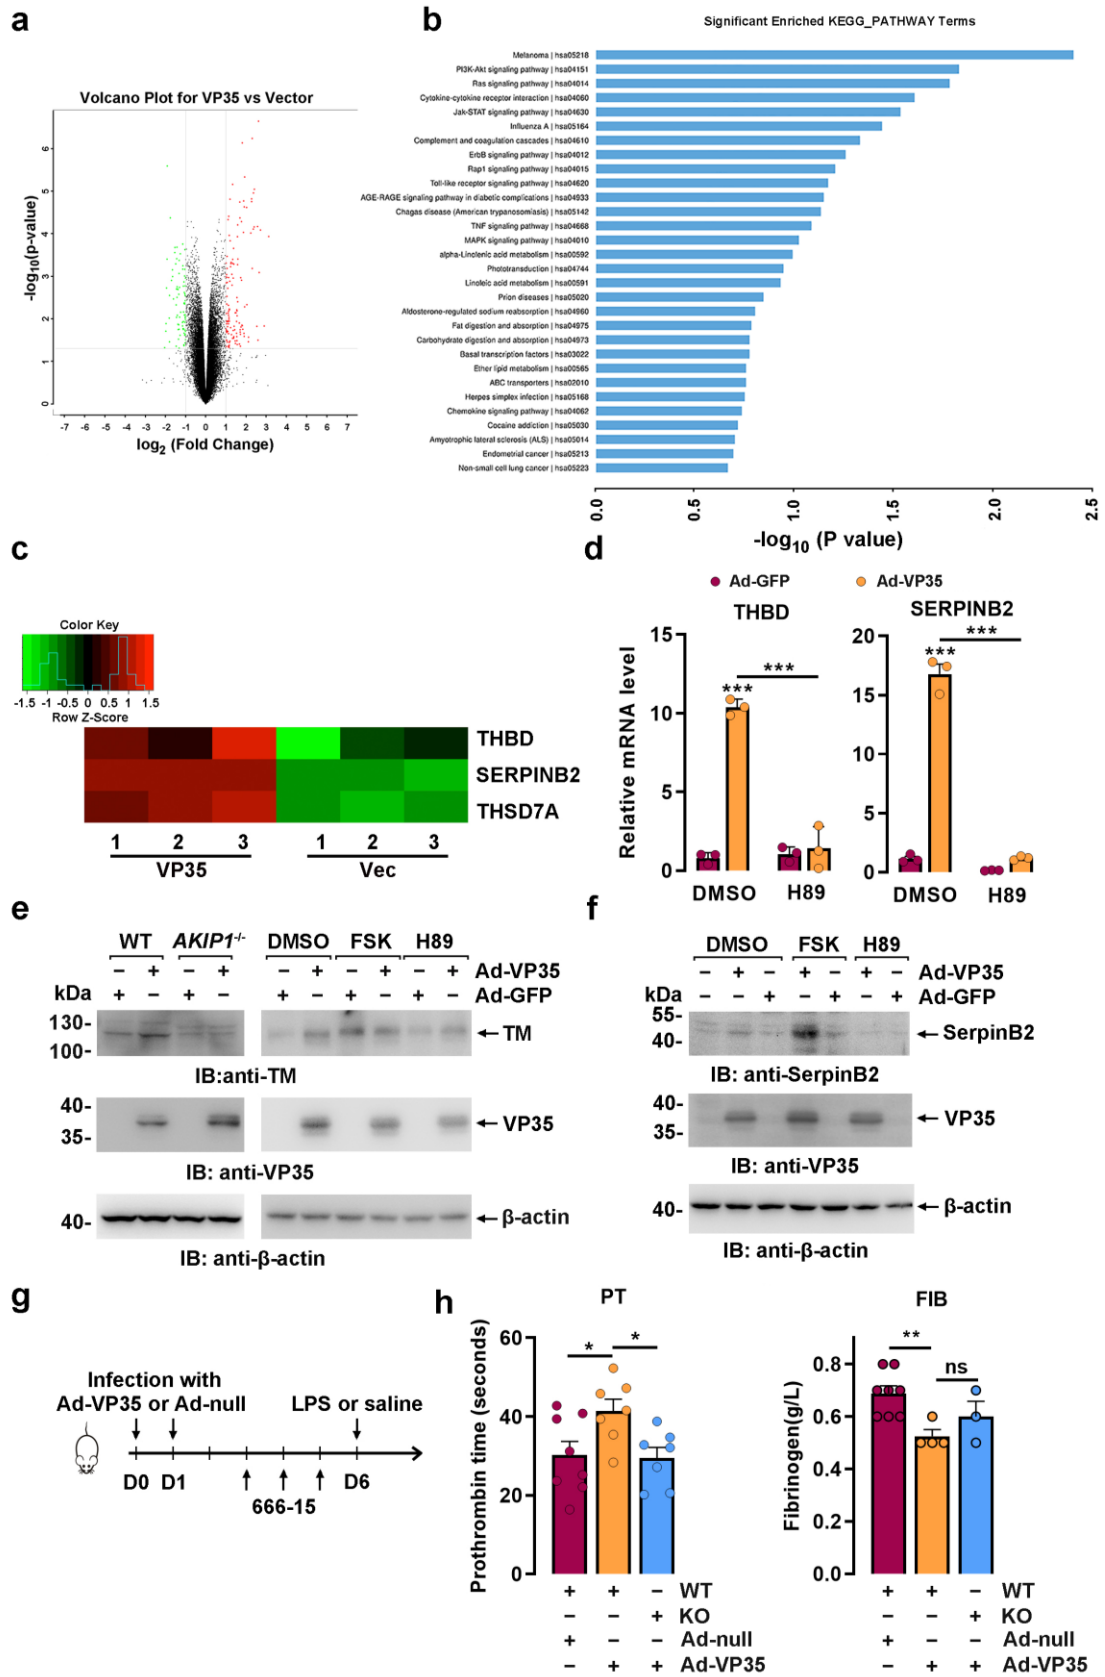

145

146 **Supplementary Fig. 9 EBOV VP35 promotes the transcription and expression of**

147 **coagulation-related genes via the AKIP1-PKA-CREB1 axis.**

148 **a**, Gene expression in HepG2 cells transfected with VP35 or vector was analyzed with a gene  
149 expression microarray. Differentially expressed genes regulated by VP35 in HepG2 cells are  
150 presented via a gene expression spectrum scatter plot. **b**, Top 20 KEGG pathways enriched in  
151 differentially expressed genes ( $\geq 2$ -fold or  $\leq -2$ -fold) regulated by VP35. **c**, Transcription of  
152 coagulation-related genes regulated by VP35 is shown as a heat map. **d**, HepG2 cells infected with  
153 Ad-VP35 or Ad-GFP for 48 h were treated with or without H89 (10  $\mu$ M) for another 4 h. *THBD*  
154 and *SERPINB2* mRNA levels were determined by qRT-PCR, and normalized fold induction was  
155 demonstrated. Differences between the two groups were evaluated using the two-sided unpaired  
156 Student's *t*-test. Data are presented as mean  $\pm$  s.e.m. (\* $P < 0.05$ ; \*\* $P < 0.01$ ). **e**, **f**, HepG2 cells (**e**,  
157 left and **f**) or HUVECs (**e**, right) infected with Ad-VP35 or Ad-GFP were treated with FSK (25  
158  $\mu$ M), H89 (10  $\mu$ M) or vehicle for 4 h. Cell lysates were analyzed by immunoblotting. **g**, Schematic  
159 experimental design of Ad-VP35 or Ad-null infection, as well as 666-15 and LPS administration.  
160 **h**, WT and *Akip1*<sup>-/-</sup> (KO) C57BL/6N mice (10 weeks) were intravenously injected with Ad-VP35  
161 or Ad-null ( $2 \times 10^9$  PFU) via tail vein injection twice at an interval of 24 h. Six days post infection,  
162 the mice were injected with LPS (5 mg/kg) via the tail vein. Four hours later, the prothrombin time  
163 (PT) and serum fibrinogen (FIB) concentrations were determined (n=3-8). Differences between  
164 the two groups were evaluated using the two-sided unpaired Student's *t*-test. The data from three  
165 independent experiments are presented as the means  $\pm$  s.e.m. (ns, not significant; \* $P < 0.05$ ; \*\* $P <$   
166 0.01).  
167



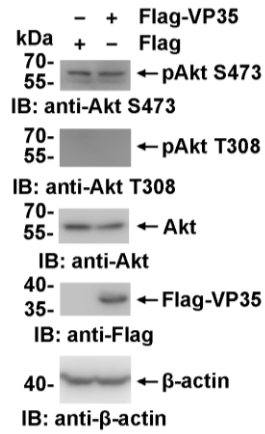

168

169 **Supplementary Fig. 10 Akt S473 and T308 phosphorylation is not regulated by EBOV VP35.**

170 Lysates of HepG2 cells transfected with Flag or Flag-VP35 plasmid were analyzed by

171 immunoblotting with anti-Akt S473 or anti-Akt T308. The data from two independent experiments

172 are presented.

173

174 **Supplementary Table**175 **Supplementary Table 1.** Primers used for qRT-PCR.

| Gene Product  | Forward primer (5' to 3') | Reverse primer (5' to 3')  |
|---------------|---------------------------|----------------------------|
| h-GAPDH       | AAggTCATCCCTgAgCTgAAC     | ACgCCTgCTTCACCACCTTCT      |
| h-AKIP1       | AAggCTggCTCTAgAAgTgC      | CTgTTTCTCTAggTggggCg       |
| h-CREB1       | gTATATTgCCATTACCCAgggAg   | CTgCTgCATTggTCATggT        |
| h-THBD        | CCCAACACCCAggCTAgCT       | gATgTCCgTgCAgATgAAACC      |
| h-SerpinB2    | gTTACCCCATgACTCCAgA       | CgCAgACTTCTCACCAAACA       |
| VP40          | GGAGGCCATATACCCTGTCAGGTC  | GCCTGGTGTGTGGCTGGCAT       |
| 3Le           | TCTCCgAAgggAgCAAgggCA     | ACCCCAAgCTTTAgggTTgTTgAATC |
| 5Tr           | TggCCTCTCTCCCTgCgTgA      | TCAACCAAAGCACTATTCCATCTggC |
| h-IFN $\beta$ | AGGACAGGATGAACTTTGAC      | TGATAGACATTAGCCAGGAG       |
| h-ISG15       | CTCTGAGCATCCTGGTGAGGAA    | AAGGTCAGCCAGAACAGGTCGT     |

176
